# Supplementary material for: Polycomb-mediated repression of paternal chromosomes maintains haploid dosage in diploid embryos of Marchantia
Source: eLife. 2022 Aug 23;11:e79258. doi: 10.7554/eLife.79258 (PMC9402228; doi:10.7554/eLife.79258)
Supplement: Supplementary file 2. — List of all Marchantia genes and the presence or absence of H3K27me3 peaks in e(z)2/e(z)3 mutant embryos plus whether the genes were upregulated, downregulated, or unchanged in a differential gene expression analysis between wild-type and e(z)2/e(z)3 mutant embryos. [file elife-79258-supp2.csv]

Pearson's Chi-squared test						Chi-squared table legend
	Upregulated	Unchanged	Downregulated	Row Totals		the observed cell totals, (the expected cell totals) and [the chi-square statistic for each cell]
Yes peak	516ÊÊ(579.65)ÊÊ[6.99]	1830ÊÊ(1886.73)ÊÊ[1.71]	424ÊÊ(303.62)ÊÊ[47.73]	2770
No peak	3308ÊÊ(3244.35)ÊÊ[1.25]	10617ÊÊ(10560.27)ÊÊ[0.30]	1579ÊÊ(1699.38)ÊÊ[8.53]	15504
Column Totals	3824	12447	2003	18274ÊÊ(Grand Total)
	data: matrix(c(516, 3308, 1830, 10617, 424, 1579), nrow = 2)
	X-squared = 66.507, df = 2, p-value = 3.616e-15
Fisher's Exact Test for Count Data
	Upregulated+Unchanged	Downregulated	Marginal Row Totals
Yes peak	2346	424	2770
No peak	13925	1579	15504
Marginal Column Totals	16271	2003	18274 Ê(Grand Total)
	data: matrix(c(2346, 13925, 424, 1579), nrow = 2)
	p-value = 2.457e-14
	alternative hypothesis: true odds ratio is not equal to 1
	95 percent confidence interval:
	0.5582458 0.7061702
	sample estimates:
	odds ratio
	0.6274259
